# Supplementary material
Source: publisher figshare collection journal article supplement (https://acs.figshare.com/ndownloader/files/4174879)
Supplement: Supplementary file 1 [file 4174879]

 
data_waf772 
 
_audit_creation_method            SHELXL-97 
_chemical_name_systematic 
; 
 ? 
; 
_chemical_name_common             ? 
_chemical_melting_point           ? 
_chemical_formula_moiety          ? 
_chemical_formula_sum 
 'C27 H24 O6' 
_chemical_formula_weight          444.46 
 
loop_ 
 _atom_type_symbol 
 _atom_type_description 
 _atom_type_scat_dispersion_real 
 _atom_type_scat_dispersion_imag 
 _atom_type_scat_source 
 'C'  'C'   0.0033   0.0016 
 'International Tables Vol C Tables 4.2.6.8 and 6.1.1.4' 
 'H'  'H'   0.0000   0.0000 
 'International Tables Vol C Tables 4.2.6.8 and 6.1.1.4' 
 'O'  'O'   0.0106   0.0060 
 'International Tables Vol C Tables 4.2.6.8 and 6.1.1.4' 
 
_symmetry_cell_setting            Triclinic 
_symmetry_space_group_name_H-M    P-1
 
loop_ 
 _symmetry_equiv_pos_as_xyz 
 'x, y, z' 
 '-x, -y, -z' 
 
_cell_length_a                    10.2737(5) 
_cell_length_b                    10.3745(4) 
_cell_length_c                    10.5840(5) 
_cell_angle_alpha                 80.793(2) 
_cell_angle_beta                  78.723(2) 
_cell_angle_gamma                 85.817(2) 
_cell_volume                      1091.05(9) 
_cell_formula_units_Z             2 
_cell_measurement_temperature     153(2) 
_cell_measurement_reflns_used     3356 
_cell_measurement_theta_min       1
_cell_measurement_theta_max       27.5 
 
_exptl_crystal_description        laths 
_exptl_crystal_colour             colorless
_exptl_crystal_size_max           0.25
_exptl_crystal_size_mid           0.09
_exptl_crystal_size_min           0.05
_exptl_crystal_density_meas       ? 
_exptl_crystal_density_diffrn     1.353 
_exptl_crystal_density_method     'not measured' 
_exptl_crystal_F_000              468 
_exptl_absorpt_coefficient_mu     0.095 
_exptl_absorpt_correction_type    none
_exptl_absorpt_correction_T_min   ? 
_exptl_absorpt_correction_T_max   ? 
_exptl_absorpt_process_details    ? 
 
_exptl_special_details 
; 
 ? 
; 
 
_diffrn_ambient_temperature       153(2) 
_diffrn_radiation_wavelength      0.71073 
_diffrn_radiation_type            MoK\a 
_diffrn_radiation_source          'fine-focus sealed tube' 
_diffrn_radiation_monochromator   graphite 
_diffrn_measurement_device_type   'Nonius Kappa CCD' 
_diffrn_measurement_method        \w-scans
_diffrn_detector_area_resol_mean  ? 
_diffrn_standards_number          ? 
_diffrn_standards_interval_count  ? 
_diffrn_standards_interval_time   ? 
_diffrn_standards_decay_%         ? 
_diffrn_reflns_number             7248 
_diffrn_reflns_av_R_equivalents   0.0539 
_diffrn_reflns_av_sigmaI/netI     0.1813 
_diffrn_reflns_limit_h_min        -13 
_diffrn_reflns_limit_h_max        12 
_diffrn_reflns_limit_k_min        -13 
_diffrn_reflns_limit_k_max        11 
_diffrn_reflns_limit_l_min        -13 
_diffrn_reflns_limit_l_max        11 
_diffrn_reflns_theta_min          1.98 
_diffrn_reflns_theta_max          27.50 
_reflns_number_total              4900 
_reflns_number_gt                 2096 
_reflns_threshold_expression      >2sigma(I) 
 
_publ_section_references
;
Altomare A., Burla M.C., Camalli M., Cascarano G.L., Giacovazzo C., 
Guagliardi A., Moliterni A.G.G., Polidori G.,Spagna R. Sir97.  
(1999) J. Appl. Cryst. 32, 115-119.

Otwinowski, Z. and Minor, W.  (1997).  Methods in Enzymology,
276, Macromolecular Crystallography, part A, 307-326, C. W. Carter,
Jr. and R. M. Sweets, Eds., Academic Press.

Sheldrick, G. M.  (1998).  SHELXTL/PC.  Release 5.10.  Siemens 
Analytical X-ray Instruments, Inc., Madison, WI, USA.


;
_computing_data_collection        'Collect software, Nonius B.V. 1998'
_computing_cell_refinement        'Collect software, Nonius B.V. 1998'
_computing_data_reduction         
;
DENZO and Scalepack (Otwinoski and Minor, 1997)
;
_computing_structure_solution     
;

SIR97 - Altomare A., Burla M.C., Camalli M., Cascarano G.L., Giacovazzo C., 
Guagliardi A., Moliterni A.G.G., Polidori G.,Spagna R.
;
_computing_structure_refinement   'XL SHELXTL/PC, Siemens Analytical'
_computing_molecular_graphics     'XP SHELXTL/PC, Siemens Analytical' 
_computing_publication_material   ? 


  
_refine_special_details 
; 
 Refinement of F^2^ against ALL reflections.  The weighted R-factor wR and 
 goodness of fit S are based on F^2^, conventional R-factors R are based 
 on F, with F set to zero for negative F^2^. The threshold expression of 
 F^2^ > 2sigma(F^2^) is used only for calculating R-factors(gt) etc. and is 
 not relevant to the choice of reflections for refinement.  R-factors based 
 on F^2^ are statistically about twice as large as those based on F, and R- 
 factors based on ALL data will be even larger. 
; 
 
_refine_ls_structure_factor_coef  Fsqd  
_refine_ls_matrix_type            full 
_refine_ls_weighting_scheme       calc  
_refine_ls_weighting_details 
 'calc w=1/[\s^2^(Fo^2^)+(0.0338P)^2^] where P=(Fo^2^+2Fc^2^)/3' 
_atom_sites_solution_primary      direct 
_atom_sites_solution_secondary    difmap 
_atom_sites_solution_hydrogens    geom 
_refine_ls_hydrogen_treatment     refall 
_refine_ls_extinction_method      SHELXL 
_refine_ls_extinction_coef        0.0145(17) 
_refine_ls_extinction_expression 
 'Fc^*^=kFc[1+0.001xFc^2^\l^3^/sin(2\q)]^-1/4^' 
_refine_ls_number_reflns          4900 
_refine_ls_number_parameters      395 
_refine_ls_number_restraints      0 
_refine_ls_R_factor_all           0.1841 
_refine_ls_R_factor_gt            0.0548 
_refine_ls_wR_factor_ref          0.1255 
_refine_ls_wR_factor_gt           0.0932 
_refine_ls_goodness_of_fit_ref    0.957 
_refine_ls_restrained_S_all       0.957 
_refine_ls_shift/su_max           0.001 
_refine_ls_shift/su_mean          0.000 
 
loop_ 
 _atom_site_label 
 _atom_site_type_symbol 
 _atom_site_fract_x 
 _atom_site_fract_y 
 _atom_site_fract_z 
 _atom_site_U_iso_or_equiv 
 _atom_site_adp_type 
 _atom_site_occupancy 
 _atom_site_symmetry_multiplicity 
 _atom_site_calc_flag 
 _atom_site_refinement_flags 
 _atom_site_disorder_assembly 
 _atom_site_disorder_group 
O1 O 0.09214(17) 0.54130(17) 0.34143(17) 0.0265(5) Uani 1 1 d . . . 
C2 C 0.1751(3) 0.4338(3) 0.2902(3) 0.0254(7) Uani 1 1 d . . . 
C3 C 0.0887(3) 0.3664(2) 0.2202(3) 0.0251(7) Uani 1 1 d . . . 
C4 C 0.1444(3) 0.3600(3) 0.0958(3) 0.0258(7) Uani 1 1 d . . . 
C5 C 0.2721(3) 0.4248(3) 0.0635(3) 0.0262(7) Uani 1 1 d . . . 
C6 C 0.2848(3) 0.4971(3) 0.1755(2) 0.0237(7) Uani 1 1 d . . . 
C7 C 0.2305(3) 0.6356(3) 0.1565(3) 0.0232(7) Uani 1 1 d . . . 
C8 C 0.2739(3) 0.7439(3) 0.0669(3) 0.0265(7) Uani 1 1 d . . . 
C9 C 0.2040(3) 0.8639(3) 0.0723(3) 0.0297(7) Uani 1 1 d . . . 
C10 C 0.0888(3) 0.8729(3) 0.1666(3) 0.0273(7) Uani 1 1 d . . . 
C11 C 0.0444(3) 0.7668(3) 0.2595(3) 0.0266(7) Uani 1 1 d . . . 
C12 C 0.1203(3) 0.6510(3) 0.2519(3) 0.0248(7) Uani 1 1 d . . . 
C13 C 0.2312(2) 0.3507(3) 0.3988(3) 0.0247(7) Uani 1 1 d . . . 
C14 C 0.2718(3) 0.2200(3) 0.3914(3) 0.0264(7) Uani 1 1 d . . . 
C15 C 0.3379(3) 0.1483(3) 0.4835(3) 0.0307(7) Uani 1 1 d . . . 
C16 C 0.3641(3) 0.2059(3) 0.5844(3) 0.0281(7) Uani 1 1 d . . . 
C17 C 0.3220(3) 0.3326(3) 0.5950(3) 0.0291(7) Uani 1 1 d . . . 
C18 C 0.2560(3) 0.4048(3) 0.5030(3) 0.0307(8) Uani 1 1 d . . . 
O19 O 0.43556(19) 0.12774(18) 0.66798(18) 0.0371(5) Uani 1 1 d . . . 
C20 C 0.4849(4) 0.1896(4) 0.7579(4) 0.0429(9) Uani 1 1 d . . . 
C21 C -0.0460(3) 0.3277(3) 0.2873(3) 0.0265(7) Uani 1 1 d . . . 
C22 C -0.1543(3) 0.3669(3) 0.2243(3) 0.0306(8) Uani 1 1 d . . . 
C23 C -0.2813(3) 0.3368(3) 0.2856(3) 0.0348(8) Uani 1 1 d . . . 
C24 C -0.3045(3) 0.2652(3) 0.4082(3) 0.0380(9) Uani 1 1 d . . . 
C25 C -0.2011(3) 0.2254(3) 0.4721(3) 0.0363(8) Uani 1 1 d . . . 
C26 C -0.0718(3) 0.2582(3) 0.4123(3) 0.0316(7) Uani 1 1 d . . . 
C27 C 0.0974(4) 0.2972(4) -0.0048(3) 0.0349(8) Uani 1 1 d . . . 
O28 O 0.35463(18) 0.42306(17) -0.03629(18) 0.0328(5) Uani 1 1 d . . . 
O29 O 0.4143(2) 0.4811(2) 0.2055(2) 0.0299(5) Uani 1 1 d . . . 
O30 O 0.38639(18) 0.72296(18) -0.02085(18) 0.0325(5) Uani 1 1 d . . . 
C31 C 0.4432(4) 0.8331(4) -0.1086(3) 0.0397(8) Uani 1 1 d . . . 
O32 O 0.02484(19) 0.99300(18) 0.15951(19) 0.0371(5) Uani 1 1 d . . . 
C33 C -0.1015(3) 1.0027(4) 0.2421(4) 0.0406(9) Uani 1 1 d . . . 
H1O H 0.464(3) 0.500(3) 0.138(3) 0.062(13) Uiso 1 1 d . . . 
H9 H 0.232(2) 0.945(2) 0.004(3) 0.032(8) Uiso 1 1 d . . . 
H11 H -0.038(3) 0.775(2) 0.321(3) 0.031(7) Uiso 1 1 d . . . 
H14 H 0.252(2) 0.176(2) 0.317(3) 0.042(8) Uiso 1 1 d . . . 
H15 H 0.367(2) 0.057(2) 0.479(2) 0.023(7) Uiso 1 1 d . . . 
H17 H 0.343(3) 0.375(2) 0.658(3) 0.041(9) Uiso 1 1 d . . . 
H18 H 0.226(2) 0.496(2) 0.515(2) 0.024(7) Uiso 1 1 d . . . 
H20A H 0.540(3) 0.128(3) 0.796(3) 0.046(10) Uiso 1 1 d . . . 
H20B H 0.411(3) 0.221(3) 0.826(3) 0.051(9) Uiso 1 1 d . . . 
H20C H 0.533(3) 0.265(3) 0.717(3) 0.043(10) Uiso 1 1 d . . . 
H22 H -0.136(3) 0.420(3) 0.135(3) 0.038(8) Uiso 1 1 d . . . 
H23 H -0.349(3) 0.365(3) 0.244(3) 0.050(10) Uiso 1 1 d . . . 
H24 H -0.399(3) 0.247(2) 0.453(2) 0.030(7) Uiso 1 1 d . . . 
H25 H -0.213(3) 0.178(3) 0.555(3) 0.043(9) Uiso 1 1 d . . . 
H26 H 0.006(3) 0.231(2) 0.458(3) 0.038(8) Uiso 1 1 d . . . 
H27A H 0.030(3) 0.234(3) 0.035(3) 0.060(10) Uiso 1 1 d . . . 
H27B H 0.179(4) 0.242(3) -0.055(4) 0.092(12) Uiso 1 1 d . . . 
H27C H 0.054(4) 0.360(4) -0.060(4) 0.086(14) Uiso 1 1 d . . . 
H31A H 0.527(3) 0.797(3) -0.164(3) 0.047(9) Uiso 1 1 d . . . 
H31B H 0.477(3) 0.904(3) -0.062(3) 0.084(12) Uiso 1 1 d . . . 
H31C H 0.385(3) 0.873(3) -0.164(3) 0.053(10) Uiso 1 1 d . . . 
H33A H -0.136(3) 1.099(3) 0.225(3) 0.075(11) Uiso 1 1 d . . . 
H33B H -0.091(3) 0.984(3) 0.335(3) 0.040(8) Uiso 1 1 d . . . 
H33C H -0.160(3) 0.937(3) 0.225(3) 0.056(10) Uiso 1 1 d . . . 
 
loop_ 
 _atom_site_aniso_label 
 _atom_site_aniso_U_11 
 _atom_site_aniso_U_22 
 _atom_site_aniso_U_33 
 _atom_site_aniso_U_23 
 _atom_site_aniso_U_13 
 _atom_site_aniso_U_12 
O1 0.0276(11) 0.0245(11) 0.0254(11) -0.0011(9) -0.0023(9) -0.0002(9) 
C2 0.0200(16) 0.0285(17) 0.0274(16) -0.0071(14) -0.0019(13) 0.0005(13) 
C3 0.0235(16) 0.0238(17) 0.0274(16) -0.0009(14) -0.0057(13) -0.0013(13) 
C4 0.0234(16) 0.0273(17) 0.0261(17) -0.0028(14) -0.0040(13) -0.0016(13) 
C5 0.0242(17) 0.0278(17) 0.0228(16) 0.0035(14) -0.0022(14) 0.0025(14) 
C6 0.0179(16) 0.0291(18) 0.0240(16) -0.0006(14) -0.0059(13) -0.0014(13) 
C7 0.0235(16) 0.0254(17) 0.0214(15) -0.0019(14) -0.0068(13) -0.0012(14) 
C8 0.0224(17) 0.0316(19) 0.0255(16) -0.0032(15) -0.0042(14) -0.0050(15) 
C9 0.0319(18) 0.0279(19) 0.0285(17) 0.0000(15) -0.0060(15) -0.0037(16) 
C10 0.0299(18) 0.0261(18) 0.0277(17) -0.0046(15) -0.0097(14) 0.0004(15) 
C11 0.0278(18) 0.0305(19) 0.0207(16) -0.0033(15) -0.0031(14) -0.0001(16) 
C12 0.0284(17) 0.0254(18) 0.0200(16) 0.0039(14) -0.0083(14) -0.0038(14) 
C13 0.0199(16) 0.0283(18) 0.0236(16) -0.0007(14) -0.0006(13) -0.0019(13) 
C14 0.0243(17) 0.0307(19) 0.0240(16) -0.0033(15) -0.0050(14) 0.0001(14) 
C15 0.0270(18) 0.0269(19) 0.0368(19) -0.0019(16) -0.0051(15) -0.0008(15) 
C16 0.0232(17) 0.0326(19) 0.0274(17) 0.0020(15) -0.0070(14) -0.0017(14) 
C17 0.0297(18) 0.0319(19) 0.0278(17) -0.0057(16) -0.0106(14) 0.0016(15) 
C18 0.0360(19) 0.0283(18) 0.0287(18) -0.0049(15) -0.0089(15) 0.0010(15) 
O19 0.0395(13) 0.0352(12) 0.0378(13) 0.0009(11) -0.0160(11) 0.0012(10) 
C20 0.047(2) 0.052(3) 0.034(2) -0.004(2) -0.0203(19) 0.003(2) 
C21 0.0247(17) 0.0275(17) 0.0269(17) -0.0053(15) -0.0027(14) -0.0020(14) 
C22 0.0290(19) 0.0285(19) 0.0329(19) -0.0012(16) -0.0051(16) -0.0021(15) 
C23 0.024(2) 0.042(2) 0.040(2) -0.0112(18) -0.0091(17) 0.0041(16) 
C24 0.0200(19) 0.050(2) 0.045(2) -0.0176(19) 0.0019(17) -0.0072(17) 
C25 0.038(2) 0.044(2) 0.0262(18) -0.0023(17) -0.0018(17) -0.0122(17) 
C26 0.0262(19) 0.040(2) 0.0270(17) -0.0016(15) -0.0029(15) -0.0072(15) 
C27 0.038(2) 0.037(2) 0.0315(19) -0.0068(18) -0.0069(17) -0.0129(19) 
O28 0.0295(12) 0.0369(13) 0.0298(11) -0.0055(10) 0.0002(10) -0.0024(10) 
O29 0.0207(12) 0.0367(13) 0.0307(13) -0.0004(11) -0.0046(11) -0.0011(10) 
O30 0.0269(12) 0.0343(13) 0.0306(12) 0.0033(10) 0.0034(10) -0.0049(10) 
C31 0.034(2) 0.041(2) 0.037(2) 0.0069(19) 0.0037(18) -0.0086(19) 
O32 0.0369(13) 0.0259(12) 0.0419(13) -0.0007(10) 0.0029(10) 0.0035(10) 
C33 0.039(2) 0.037(2) 0.041(2) -0.0040(19) 0.0025(18) 0.0015(18) 
 
_geom_special_details 
; 
 All esds (except the esd in the dihedral angle between two l.s. planes) 
 are estimated using the full covariance matrix.  The cell esds are taken 
 into account individually in the estimation of esds in distances, angles 
 and torsion angles; correlations between esds in cell parameters are only 
 used when they are defined by crystal symmetry.  An approximate (isotropic) 
 treatment of cell esds is used for estimating esds involving l.s. planes. 
; 
 
loop_ 
 _geom_bond_atom_site_label_1 
 _geom_bond_atom_site_label_2 
 _geom_bond_distance 
 _geom_bond_site_symmetry_2 
 _geom_bond_publ_flag 
O1 C12 1.368(3) . ? 
O1 C2 1.462(3) . ? 
C2 C13 1.506(4) . ? 
C2 C3 1.529(3) . ? 
C2 C6 1.580(4) . ? 
C3 C4 1.339(4) . ? 
C3 C21 1.478(4) . ? 
C4 C5 1.473(4) . ? 
C4 C27 1.504(4) . ? 
C5 O28 1.220(3) . ? 
C5 C6 1.530(3) . ? 
C6 O29 1.419(3) . ? 
C6 C7 1.501(3) . ? 
C7 C12 1.380(4) . ? 
C7 C8 1.388(4) . ? 
C8 O30 1.362(3) . ? 
C8 C9 1.394(4) . ? 
C9 C10 1.398(4) . ? 
C9 H9 1.04(3) . ? 
C10 O32 1.364(3) . ? 
C10 C11 1.393(4) . ? 
C11 C12 1.388(4) . ? 
C11 H11 0.96(3) . ? 
C13 C18 1.388(3) . ? 
C13 C14 1.398(3) . ? 
C14 C15 1.385(4) . ? 
C14 H14 1.03(2) . ? 
C15 C16 1.382(4) . ? 
C15 H15 0.98(2) . ? 
C16 C17 1.369(4) . ? 
C16 O19 1.385(3) . ? 
C17 C18 1.386(4) . ? 
C17 H17 0.92(2) . ? 
C18 H18 1.00(2) . ? 
O19 C20 1.416(3) . ? 
C20 H20A 0.92(3) . ? 
C20 H20B 1.01(3) . ? 
C20 H20C 0.95(3) . ? 
C21 C26 1.388(4) . ? 
C21 C22 1.409(4) . ? 
C22 C23 1.374(4) . ? 
C22 H22 1.01(3) . ? 
C23 C24 1.374(4) . ? 
C23 H23 0.91(3) . ? 
C24 C25 1.373(4) . ? 
C24 H24 1.01(3) . ? 
C25 C26 1.397(4) . ? 
C25 H25 0.92(3) . ? 
C26 H26 1.01(3) . ? 
C27 H27A 0.98(3) . ? 
C27 H27B 1.08(4) . ? 
C27 H27C 0.95(4) . ? 
O29 H1O 0.80(4) . ? 
O30 C31 1.433(4) . ? 
C31 H31A 1.03(3) . ? 
C31 H31B 1.06(3) . ? 
C31 H31C 0.94(3) . ? 
O32 C33 1.423(4) . ? 
C33 H33A 1.03(3) . ? 
C33 H33B 1.00(3) . ? 
C33 H33C 1.00(3) . ? 
 
loop_ 
 _geom_angle_atom_site_label_1 
 _geom_angle_atom_site_label_2 
 _geom_angle_atom_site_label_3 
 _geom_angle 
 _geom_angle_site_symmetry_1 
 _geom_angle_site_symmetry_3 
 _geom_angle_publ_flag 
C12 O1 C2 106.8(2) . . ? 
O1 C2 C13 109.4(2) . . ? 
O1 C2 C3 106.03(19) . . ? 
C13 C2 C3 116.9(2) . . ? 
O1 C2 C6 107.0(2) . . ? 
C13 C2 C6 113.6(2) . . ? 
C3 C2 C6 103.3(2) . . ? 
C4 C3 C21 127.2(2) . . ? 
C4 C3 C2 112.7(2) . . ? 
C21 C3 C2 119.9(2) . . ? 
C3 C4 C5 109.7(2) . . ? 
C3 C4 C27 130.1(3) . . ? 
C5 C4 C27 120.2(3) . . ? 
O28 C5 C4 126.2(2) . . ? 
O28 C5 C6 124.9(2) . . ? 
C4 C5 C6 108.9(2) . . ? 
O29 C6 C7 115.2(2) . . ? 
O29 C6 C5 112.2(2) . . ? 
C7 C6 C5 112.1(2) . . ? 
O29 C6 C2 113.0(2) . . ? 
C7 C6 C2 100.6(2) . . ? 
C5 C6 C2 102.5(2) . . ? 
C12 C7 C8 118.5(3) . . ? 
C12 C7 C6 109.6(3) . . ? 
C8 C7 C6 131.9(3) . . ? 
O30 C8 C7 115.4(2) . . ? 
O30 C8 C9 124.7(3) . . ? 
C7 C8 C9 119.9(3) . . ? 
C8 C9 C10 119.4(3) . . ? 
C8 C9 H9 121.4(14) . . ? 
C10 C9 H9 119.1(13) . . ? 
O32 C10 C11 123.4(3) . . ? 
O32 C10 C9 114.6(3) . . ? 
C11 C10 C9 122.0(3) . . ? 
C12 C11 C10 116.0(3) . . ? 
C12 C11 H11 124.1(16) . . ? 
C10 C11 H11 119.8(16) . . ? 
O1 C12 C7 114.0(2) . . ? 
O1 C12 C11 122.0(3) . . ? 
C7 C12 C11 124.0(3) . . ? 
C18 C13 C14 117.9(3) . . ? 
C18 C13 C2 120.8(2) . . ? 
C14 C13 C2 120.9(2) . . ? 
C15 C14 C13 120.8(3) . . ? 
C15 C14 H14 119.5(14) . . ? 
C13 C14 H14 119.7(14) . . ? 
C16 C15 C14 119.8(3) . . ? 
C16 C15 H15 118.7(13) . . ? 
C14 C15 H15 121.5(13) . . ? 
C17 C16 C15 120.1(3) . . ? 
C17 C16 O19 124.5(2) . . ? 
C15 C16 O19 115.4(2) . . ? 
C16 C17 C18 120.2(3) . . ? 
C16 C17 H17 121.4(16) . . ? 
C18 C17 H17 118.1(16) . . ? 
C17 C18 C13 121.0(3) . . ? 
C17 C18 H18 117.9(13) . . ? 
C13 C18 H18 121.1(14) . . ? 
C16 O19 C20 117.0(2) . . ? 
O19 C20 H20A 105.9(17) . . ? 
O19 C20 H20B 112.5(16) . . ? 
H20A C20 H20B 110(3) . . ? 
O19 C20 H20C 112.3(17) . . ? 
H20A C20 H20C 110(3) . . ? 
H20B C20 H20C 106(2) . . ? 
C26 C21 C22 118.1(3) . . ? 
C26 C21 C3 122.9(3) . . ? 
C22 C21 C3 119.0(3) . . ? 
C23 C22 C21 120.5(3) . . ? 
C23 C22 H22 121.4(15) . . ? 
C21 C22 H22 118.0(15) . . ? 
C22 C23 C24 120.5(3) . . ? 
C22 C23 H23 119(2) . . ? 
C24 C23 H23 121(2) . . ? 
C25 C24 C23 120.4(3) . . ? 
C25 C24 H24 120.2(15) . . ? 
C23 C24 H24 119.3(15) . . ? 
C24 C25 C26 119.7(3) . . ? 
C24 C25 H25 122.5(18) . . ? 
C26 C25 H25 117.8(18) . . ? 
C21 C26 C25 120.7(3) . . ? 
C21 C26 H26 118.1(16) . . ? 
C25 C26 H26 121.1(16) . . ? 
C4 C27 H27A 111.7(17) . . ? 
C4 C27 H27B 109.6(18) . . ? 
H27A C27 H27B 105(2) . . ? 
C4 C27 H27C 111(2) . . ? 
H27A C27 H27C 105(3) . . ? 
H27B C27 H27C 115(3) . . ? 
C6 O29 H1O 106(2) . . ? 
C8 O30 C31 118.2(2) . . ? 
O30 C31 H31A 106.0(16) . . ? 
O30 C31 H31B 113.8(19) . . ? 
H31A C31 H31B 105(2) . . ? 
O30 C31 H31C 112(2) . . ? 
H31A C31 H31C 109(2) . . ? 
H31B C31 H31C 110(3) . . ? 
C10 O32 C33 116.7(2) . . ? 
O32 C33 H33A 107(2) . . ? 
O32 C33 H33B 109.8(15) . . ? 
H33A C33 H33B 107(2) . . ? 
O32 C33 H33C 109.0(17) . . ? 
H33A C33 H33C 115(2) . . ? 
H33B C33 H33C 109(2) . . ? 
 
loop_ 
 _geom_torsion_atom_site_label_1 
 _geom_torsion_atom_site_label_2 
 _geom_torsion_atom_site_label_3 
 _geom_torsion_atom_site_label_4 
 _geom_torsion 
 _geom_torsion_site_symmetry_1 
 _geom_torsion_site_symmetry_2 
 _geom_torsion_site_symmetry_3 
 _geom_torsion_site_symmetry_4 
 _geom_torsion_publ_flag 
C12 O1 C2 C13 137.8(2) . . . . ? 
C12 O1 C2 C3 -95.3(2) . . . . ? 
C12 O1 C2 C6 14.4(2) . . . . ? 
O1 C2 C3 C4 124.2(2) . . . . ? 
C13 C2 C3 C4 -113.6(3) . . . . ? 
C6 C2 C3 C4 11.9(3) . . . . ? 
O1 C2 C3 C21 -50.2(3) . . . . ? 
C13 C2 C3 C21 71.9(3) . . . . ? 
C6 C2 C3 C21 -162.6(2) . . . . ? 
C21 C3 C4 C5 172.2(3) . . . . ? 
C2 C3 C4 C5 -1.8(3) . . . . ? 
C21 C3 C4 C27 -9.3(5) . . . . ? 
C2 C3 C4 C27 176.7(3) . . . . ? 
C3 C4 C5 O28 170.9(3) . . . . ? 
C27 C4 C5 O28 -7.8(5) . . . . ? 
C3 C4 C5 C6 -9.7(3) . . . . ? 
C27 C4 C5 C6 171.6(3) . . . . ? 
O28 C5 C6 O29 -42.9(4) . . . . ? 
C4 C5 C6 O29 137.7(2) . . . . ? 
O28 C5 C6 C7 88.5(3) . . . . ? 
C4 C5 C6 C7 -90.9(3) . . . . ? 
O28 C5 C6 C2 -164.4(3) . . . . ? 
C4 C5 C6 C2 16.2(3) . . . . ? 
O1 C2 C6 O29 111.2(2) . . . . ? 
C13 C2 C6 O29 -9.5(3) . . . . ? 
C3 C2 C6 O29 -137.2(2) . . . . ? 
O1 C2 C6 C7 -12.2(2) . . . . ? 
C13 C2 C6 C7 -132.9(2) . . . . ? 
C3 C2 C6 C7 99.5(2) . . . . ? 
O1 C2 C6 C5 -127.9(2) . . . . ? 
C13 C2 C6 C5 111.4(2) . . . . ? 
C3 C2 C6 C5 -16.2(2) . . . . ? 
O29 C6 C7 C12 -115.9(3) . . . . ? 
C5 C6 C7 C12 114.2(2) . . . . ? 
C2 C6 C7 C12 5.9(2) . . . . ? 
O29 C6 C7 C8 61.6(4) . . . . ? 
C5 C6 C7 C8 -68.3(3) . . . . ? 
C2 C6 C7 C8 -176.6(3) . . . . ? 
C12 C7 C8 O30 177.2(2) . . . . ? 
C6 C7 C8 O30 -0.1(4) . . . . ? 
C12 C7 C8 C9 -1.9(4) . . . . ? 
C6 C7 C8 C9 -179.2(2) . . . . ? 
O30 C8 C9 C10 179.5(2) . . . . ? 
C7 C8 C9 C10 -1.5(4) . . . . ? 
C8 C9 C10 O32 -177.1(2) . . . . ? 
C8 C9 C10 C11 2.9(4) . . . . ? 
O32 C10 C11 C12 179.2(2) . . . . ? 
C9 C10 C11 C12 -0.8(4) . . . . ? 
C2 O1 C12 C7 -11.2(3) . . . . ? 
C2 O1 C12 C11 169.6(2) . . . . ? 
C8 C7 C12 O1 -175.0(2) . . . . ? 
C6 C7 C12 O1 2.9(3) . . . . ? 
C8 C7 C12 C11 4.2(4) . . . . ? 
C6 C7 C12 C11 -177.9(2) . . . . ? 
C10 C11 C12 O1 176.3(2) . . . . ? 
C10 C11 C12 C7 -2.8(4) . . . . ? 
O1 C2 C13 C18 -29.9(3) . . . . ? 
C3 C2 C13 C18 -150.3(2) . . . . ? 
C6 C2 C13 C18 89.5(3) . . . . ? 
O1 C2 C13 C14 156.5(2) . . . . ? 
C3 C2 C13 C14 36.1(4) . . . . ? 
C6 C2 C13 C14 -84.1(3) . . . . ? 
C18 C13 C14 C15 -1.7(4) . . . . ? 
C2 C13 C14 C15 172.2(3) . . . . ? 
C13 C14 C15 C16 0.1(4) . . . . ? 
C14 C15 C16 C17 1.6(4) . . . . ? 
C14 C15 C16 O19 -177.3(2) . . . . ? 
C15 C16 C17 C18 -1.6(4) . . . . ? 
O19 C16 C17 C18 177.1(3) . . . . ? 
C16 C17 C18 C13 0.0(4) . . . . ? 
C14 C13 C18 C17 1.6(4) . . . . ? 
C2 C13 C18 C17 -172.2(3) . . . . ? 
C17 C16 O19 C20 -9.9(4) . . . . ? 
C15 C16 O19 C20 168.9(3) . . . . ? 
C4 C3 C21 C26 137.1(3) . . . . ? 
C2 C3 C21 C26 -49.3(4) . . . . ? 
C4 C3 C21 C22 -45.4(4) . . . . ? 
C2 C3 C21 C22 128.2(3) . . . . ? 
C26 C21 C22 C23 0.0(4) . . . . ? 
C3 C21 C22 C23 -177.6(2) . . . . ? 
C21 C22 C23 C24 -1.5(4) . . . . ? 
C22 C23 C24 C25 1.4(4) . . . . ? 
C23 C24 C25 C26 0.2(4) . . . . ? 
C22 C21 C26 C25 1.7(4) . . . . ? 
C3 C21 C26 C25 179.2(2) . . . . ? 
C24 C25 C26 C21 -1.8(4) . . . . ? 
C7 C8 O30 C31 -174.5(2) . . . . ? 
C9 C8 O30 C31 4.5(4) . . . . ? 
C11 C10 O32 C33 -7.9(4) . . . . ? 
C9 C10 O32 C33 172.1(2) . . . . ? 
 
loop_ 
 _geom_hbond_atom_site_label_D 
 _geom_hbond_atom_site_label_H 
 _geom_hbond_atom_site_label_A 
 _geom_hbond_distance_DH 
 _geom_hbond_distance_HA 
 _geom_hbond_distance_DA 
 _geom_hbond_angle_DHA 
 _geom_hbond_site_symmetry_A 
O29 H1O O28  0.80(4) 2.10(4) 2.819(3) 149(3) 2_665 
 
_diffrn_measured_fraction_theta_max    0.974 
_diffrn_reflns_theta_full              27.50 
_diffrn_measured_fraction_theta_full   0.974 
_refine_diff_density_max    0.236 
_refine_diff_density_min   -0.259 
_refine_diff_density_rms    0.057 
